# Supplementary material for: Pristine levels of suspended sediment in large German river channels during the Anthropocene?
Source: Copernicus journal article supplement (doi:10.5194/esurf-11-287-2023), 2023-04-14
Supplement: Supplementary file 1 [file esurf-11-287-2023-supplement.zip]

Archive with 3 entries (3 files):
- Hoffmann_SSC_trends_submission_supl_revision.pdf
- SSC_Trend_Supplement_Tables_S1_S2_S3.xlsx
- esurf-11-287-2023-supplement-title-page.pdf
