# Supplementary material for: Pristine levels of suspended sediment in large German river channels during the Anthropocene?
Source: Copernicus journal article supplement (doi:10.5194/esurf-11-287-2023), 2023-04-14
Supplement: Supplementary file 1 [file esurf-11-287-2023-supplement.zip › esurf-11-287-2023-supplement-title-page.pdf]

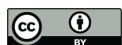

## *Supplement of*

# **Pristine levels of suspended sediment in large German river channels during the Anthropocene?**

**Thomas O. Hoffmann et al.**

*Correspondence to:* Thomas O. Hoffmann (thomas.hoffmann@bafg.de)

- esurf-11-287-2023-supplement-title-page.pdf
- Hoffmann\_SSC\_trends\_submission\_supl\_revision.pdf
- SSC\_Trend\_Supplement\_Tables\_S1\_S2\_S3.xlsx

The copyright of individual parts of the supplement might differ from the article licence.
