# Supplementary material for: Pristine levels of suspended sediment in large German river channels during the Anthropocene?
Source: Copernicus journal article supplement (doi:10.5194/esurf-11-287-2023), 2023-04-14
Supplement: Supplementary file 1 [file esurf-11-287-2023-supplement.zip › SSC_Trend_Supplement_Tables_S1_S2_S3.xlsx]

## Sheet: Tab. S1 station data
station			ERTS1989-coordinates		river name	catchment size (km²)	monitoring			hydrogeomorphic characteristics
ID	name	short name	RW	HW			start date	end date	timerange (years)	Qm (m³/s)	SSCm (mg/l)	SSLm (t/d)
102	Straubing	Str	3.2762e+07	5.42099e+06	Danube	36955	1989-11-01	2010-10-30	21.0082	461.441	16.5267	9.12709
105	Vilshofen	Vil	3.28084e+07	5.39544e+06	Danube	47677	1989-11-01	2010-10-30	21.0082	639.049	19.054	15.1746
106	Kachlet	Kac	3.28251e+07	5.39006e+06	Danube	49649	1989-11-01	2010-10-30	21.0082	644.168	19.6475	14.224
107	Jochenstein	Joc	3.28477e+07	5.38463e+06	Danube	77053	1989-11-01	2010-10-30	21.0082	1389.91	46.0104	91.4161
202	Weil	Wei	3.23933e+07	5.27416e+06	Rhine	36472	1989-11-01	2010-10-30	21.0082	1064.69	34.4902	46.7451
203	Kehl	Keh	3.24116e+07	5.3813e+06	Rhine	39330	1989-11-01	2010-10-30	21.0082	1236.92	13.6066	21.0996
205	Nierstein	Nie	3.24536e+07	5.52388e+06	Rhine	70387	1989-11-01	2010-10-30	21.0082	1410.74	21.8804	37.041
206	Plittersdorf	Pli	3.24364e+07	5.41479e+06	Rhine	48276	1989-11-01	2010-10-30	21.0082	1236.92	19.7528	29.961
207	Maxau	Max	3.24491e+07	5.43203e+06	Rhine	50196	1989-11-01	2010-10-30	21.0082	1249.48	22.218	33.599
212	Weißenthurm	Wei	3.23902e+07	5.58701e+06	Rhine	138647	1989-11-01	2010-10-30	21.0082	2073.63	30.3889	83.011
215	Emmerich	Emm	3.23102e+07	5.74544e+06	Rhine	159555	1989-11-01	2010-10-30	21.0082	2261.12	29.5571	76.5315
216	Düsseldorf	Düs	3.23441e+07	5.67729e+06	Rhine	147680	1989-11-01	2010-10-30	21.0082	2123.04	17.9151	44.1201
217	St. Goar	St_	3.24077e+07	5.55692e+06	Rhine	103842	1989-11-01	2010-10-30	21.0082	1686.93	24.2452	47.1735
221	Poppenweiler	Pop	3.2518e+07	5.41772e+06	Neckar	5005	1989-11-01	2010-10-30	21.0082	61.0919	24.0865	2.87117
222	Rockenau	Roc	3.25004e+07	5.47552e+06	Neckar	12676	1989-11-01	2010-10-30	21.0082	139.372	28.732	8.35374
223	Lauffen	Lau	3.25116e+07	5.43557e+06	Neckar	7916	1989-11-01	2010-10-30	21.0082	85.2551	22.0747	3.99391
231	Viereth	Vie	3.26283e+07	5.53169e+06	Main	12010	1989-11-01	2005-12-28	16.1671	107.719	16.9291	2.2882
232	Marktbreit	Mar	3.25811e+07	5.50815e+06	Main	13693	1989-11-01	2010-10-30	21.0082	115.344	20.6953	2.88032
233	Kleinheubach	Kle	3.25163e+07	5.50719e+06	Main	21505	1989-11-01	2010-10-30	21.0082	172.343	25.2631	6.34588
235	Garstadt	Gar	3.25843e+07	5.53687e+06	Main	12722	1989-11-01	2005-12-31	16.1753	111.982	22.0096	3.36318
236	Erlabrunn	Erl	3.25613e+07	5.52293e+06	Main	14244	1989-11-01	2005-12-30	16.1726	120.994	23.7738	3.65288
237	Steinbach	Ste	3.25476e+07	5.54522e+06	Main	17914	1989-11-01	2010-10-30	21.0082	137.227	21.353	3.42822
239	Eddersheim	Edd	3.24625e+07	5.54312e+06	Main	27100	1989-11-01	2010-10-30	21.0082	213.515	27.6444	8.04016
241	Kalkofen	Kal	3.24214e+07	5.57394e+06	Lahn	5303	1989-11-01	2010-10-30	21.0082	44.7045	20.9178	1.83788
242	Wetzlar	Wet	3.24645e+07	5.6005e+06	Lahn	2669	1989-11-01	2007-08-23	17.8192	27.9709	20.3315	0.872275
251	Wincheringen	Win	3.23126e+07	5.49836e+06	Mosel	11522	1989-11-01	2010-10-30	21.0082	142.575	31.3288	8.46381
257	Cochem	Coc	3.23693e+07	5.55759e+06	Mosel	27165	1989-11-01	2010-10-30	21.0082	318.231	27.2007	16.9194
258	Brodenbach	Bro	3.23886e+07	5.56488e+06	Mosel	27872	1989-11-01	2009-09-25	19.9123	324.704	28.9272	18.2172
260	Güdingen	Güd	3.2356e+07	5.45138e+06	Saar	3811	1989-11-01	2010-10-30	21.0082	40.3006	12.988	1.0406
277	Hamm. Wehr	Ham	3.24185e+07	5.72687e+06	Lippe	2607	1989-11-01	2010-10-30	21.0082	24.7239	14.6864	0.489907
281	Reckingen	Rec	3.24502e+07	5.26884e+06	Rhine	14718	1989-11-01	2010-10-30	21.0082	441.589	16.2603	8.60189
282	Albbruck Dogern	Alb	3.24378e+07	5.27197e+06	Rhine	33987	1989-11-01	2010-10-30	21.0082	1034.26	21.0076	28.747
301	Rheine	Rhe	3.23935e+07	5.79347e+06	Ems	3740	1989-11-01	2010-10-30	21.0082	37.9247	20.958	0.851034
303	Lathen	Lat	3.23863e+07	5.85875e+06	Ems	8686	1989-11-01	2010-10-30	21.0082	83.0946	13.7133	1.24092
401	Hann.-Münden.W.	Han	3.25453e+07	5.6966e+06	Werra	5497	1989-11-01	2010-10-30	21.0082	48.13	44.6611	2.72104
402	Hann.-Münden.F.	Han	3.25451e+07	5.69615e+06	Fulda	6947	1989-11-01	2010-10-30	21.0082	62.2148	25.4295	2.20243
403	Bodenwerder	Bod	3.25354e+07	5.75829e+06	Weser	15924	1989-11-01	2010-10-30	21.0082	147.327	23.1946	4.02256
405	Intschede	Int	3.25102e+07	5.8682e+06	Weser	37720	1989-11-01	2010-10-30	21.0082	324.473	35.7662	14.8521
406	Hameln	Ham	3.2524e+07	5.77267e+06	Weser	17077	1989-11-01	2010-10-30	21.0082	162.45	29.9969	6.21636
407	Höxter	Höx	3.25275e+07	5.73624e+06	Weser	15501	1989-11-01	2010-10-30	21.0082	142.558	30.2015	5.74251
408	Nienburg	Nie	3.25138e+07	5.83264e+06	Weser	21815	1989-11-01	2010-10-30	21.0082	201.421	29.1089	7.44749
411	Marklendorf	Mar	3.25477e+07	5.83703e+06	Aller	7209	1989-11-01	2010-10-30	21.0082	37.75	14.1029	0.57001
412	Rethem	Ret	3.25261e+07	5.84853e+06	Aller	14730	1989-11-01	2010-10-30	21.0082	111.836	20.4563	2.33819
421	Herrenhausen	Her	3.25471e+07	5.80368e+06	Leine	5304	1989-11-01	2006-04-13	16.4575	51.2522	30.5373	2.23386
502	Hitzacker	Hit	3.26371e+07	5.89159e+06	Elbe	129877	1989-11-01	2010-10-30	21.0082	671.448	33.299	19.3166
511	Pirna	Pir	3.28467e+07	5.65752e+06	Elbe	52080	1991-11-01	2010-10-30	19.0082	322.687	25.0252	11.0459
512	Torgau	Tor	3.27781e+07	5.71927e+06	Elbe	55211	1993-11-01	2010-10-30	17.0055	361.889	34.6593	16.3879
513	Wittenberg	Wit	3.27492e+07	5.75184e+06	Elbe	61879	1991-11-01	2010-10-30	19.0082	367.694	30.3579	11.9569
514	Aken	Ake	3.27105e+07	5.74978e+06	Elbe	69849	1991-11-01	2010-10-30	19.0082	429.307	26.6302	10.7869
515	Barby	Bar	3.26987e+07	5.76185e+06	Elbe	94060	1989-11-01	2010-10-30	21.0082	550.006	35.6982	20.1803
516	Magdeburg Strombr.	Mag	3.2681e+07	5.77862e+06	Elbe	94942	1992-11-01	2010-10-30	18.0055	554.767	28.0644	16.0094
518	Tangermünde	Tan	3.27024e+07	5.82634e+06	Elbe	97780	1991-11-01	2010-10-30	19.0082	560.8	33.8497	17.908
519	Wittenberge	Wit	3.26845e+07	5.87445e+06	Elbe	123532	1993-11-01	2010-10-30	17.0055	696.605	34.4449	21.3281
520	Meissen	Mei	3.28123e+07	5.67862e+06	Elbe	53885	1994-11-01	2010-10-30	16.0055	341.922	26.9755	10.3353
531	Calbe	Cal	3.26915e+07	5.75407e+06	Saale	23719	1991-11-01	2010-10-30	19.0082	112.964	29.3992	3.73311
541	Rathenow	Rat	3.27249e+07	5.83372e+06	Havel	19288	1991-11-01	2010-10-30	19.0082	73.2267	17.2038	1.21603
542	Ketzin	Ket	3.27618e+07	5.8195e+06	Havel	16173	1991-11-01	2010-10-30	19.0082	55.7093	14.9629	0.776265
543	Zehdenick	Zeh	3.27908e+07	5.87918e+06	Havel	2076	1991-11-01	2010-10-30	19.0082	10.0234	12.0928	0.11668
552	Fürstenwalde	Für	3.28447e+07	5.81258e+06	Spree	6354	1991-11-01	2010-10-30	19.0082	18.6176	11.8885	0.22215
601	Frankfurt	Fra	3.2878e+07	5.81576e+06	Oder	53580	1991-11-01	2010-10-30	19.0082	295.376	25.7814	7.07735
602	Hohensaaten	Hoh	3.2845e+07	5.86716e+06	Oder	109564	1991-11-01	2010-10-30	19.0082	502	23.4412	10.591
603	Schwedt	Sch	3.28561e+07	5.88932e+06	Oder	112950	1991-11-01	2010-10-30	19.0082	502.893	25.4476	11.3257

## Sheet: Tab. S2 trends
Station	short	river name	ETRS1989-coordinates		time range					Qm	SSCm	SSLm	linear regression			Sen's slope		seasonal Sen's slope				trend of rating parameter
ID	name		RW	HW	start	end	# years	# bad years	# samples	(m³/s)	(mg l-1)	(kg s-1)	blin	R²	plin	bSens	pMK	bwinter	pwinter	bsummer	psummer	n	Da	pDa	Db	pDb		blin_%	bsens%	bsum%	bwin%
102	Str	Donau	3.2762e+07	5.42099e+06	1989-11-01	2010-10-30	21.0082	4	5999	461.441	16.5267	9.12709	-0.14	0.06	0.345	-0.111397	0.704853	0.10876	0.77308	0.031087	0.892558	16	-0.2836	0.003	0.0206	0.1506		-0.847113	-0.674042
105	Vil	Donau	3.28084e+07	5.39544e+06	1989-11-01	2010-10-30	21.0082	0	7474	639.049	19.054	15.1746	-0.45	0.44	0.00114	-0.435742	0.000996672	-0.51152	0.0235268	-0.571558	0.0212482	17	-0.3962	0.0012	0.0036	0.8293		-2.36171	-2.28687	-2.99967	-2.68457
106	Kac	Donau	3.28251e+07	5.39006e+06	1989-11-01	2010-10-30	21.0082	0	7462	644.168	19.6475	14.224	-0.74	0.4	0.00203	-0.689207	0.000326349	-0.827289	0.000326349	-0.981929	0.00315284	12	-0.5634	0.0038	-0.0572	0.0061		-3.76638	-3.50785	-4.99773	-4.21066
107	Joc	Donau	3.28477e+07	5.38463e+06	1989-11-01	2010-10-30	21.0082	0	7394	1389.91	46.0104	91.4161	-0.38	0.03	0.421	-0.332168	0.381187	-0.747475	0.00861079	1.26816	0.144292	19	-0.2214	0.2343	0.0133	0.621		-0.825899	-0.72194		-1.62458
202	Wei	Rhein	3.23933e+07	5.27416e+06	1989-11-01	2010-10-30	21.0082	2	6742	1064.69	34.4902	46.7451	-0.81	0.19	0.0523	-1.00863	0.111887	-0.947295	0.0103743	-1.34075	0.081443	18	-0.6756	0.0082	0.0351	0.2078		-2.34849	-2.9244	-3.88733	-2.74656
203	Keh	Rhein	3.24116e+07	5.3813e+06	1989-11-01	2010-10-30	21.0082	0	7586	1236.92	13.6066	21.0996	-0.41	0.32	0.00812	-0.493877	0.00599747	-0.65287	0.000644285	-0.563695	0.064411	17	-0.4781	0.0005	0.0674	0.0021		-3.01325	-3.62969	-4.14281	-4.7982
205	Nie	Rhein	3.24536e+07	5.52388e+06	1989-11-01	2010-10-30	21.0082	0	7574	1410.74	21.8804	37.041	-0.57	0.57	6.86e-05	-0.569666	0.000996672	-0.620076	0.00599747	-0.595399	0.0251783	20	-0.709	0	0.0736	0.0003		-2.60507	-2.60354	-2.72114	-2.83393
206	Pli	Rhein	3.24364e+07	5.41479e+06	1989-11-01	2010-10-30	21.0082	0	7562	1236.92	19.7528	29.961	-0.51	0.49	0.000386	-0.532621	0.00025836	-0.848494	0.00152084	-0.512686	0.127289	19	-0.4598	0.0015	0.0425	0.0431		-2.58191	-2.69643	-2.5955	-4.29555
207	Max	Rhein	3.24491e+07	5.43203e+06	1989-11-01	2010-10-30	21.0082	0	7587	1249.48	22.218	33.599	-0.93	0.71	1.61e-06	-0.97891	2.7003e-05	-1.06641	0.000802711	-1.17414	0.00205472	19	-1.0067	0	0.0776	0.0022		-4.18579	-4.40593	-5.28462	-4.79976
212	Wei	Rhein	3.23902e+07	5.58701e+06	1989-11-01	2010-10-30	21.0082	1	6789	2073.63	30.3889	83.011	-0.6	0.35	0.00454	-0.6175	0.00719835	-0.732332	0.183447	-0.739096	0.00255022	16	-0.5991	0.0007	0.0174	0.3491		-1.97441	-2.03199	-2.43213
215	Emm	Rhein	3.23102e+07	5.74544e+06	1989-11-01	2010-10-30	21.0082	0	7273	2261.12	29.5571	76.5315	-1	0.81	2.23e-08	-0.942104	3.33817e-07	-0.95351	0.00186908	-1.19346	2.0648e-05	15	-0.861	0	0.0442	0.0099		-3.38328	-3.1874	-4.03781	-3.22599
216	Düs	Rhein	3.23441e+07	5.67729e+06	1989-11-01	2010-10-30	21.0082	0	7252	2123.04	17.9151	44.1201	-1.12	0.74	5.02e-07	-1.12723	3.51909e-05	-1.22678	0.000160255	-1.30452	2.13579e-05	9	-0.7574	0.0236	-0.0363	0.2951		-6.2517	-6.29206	-7.28168	-6.84776
217	St_	Rhein	3.24077e+07	5.55692e+06	1989-11-01	2010-10-30	21.0082	0	7561	1686.93	24.2452	47.1735	-0.96	0.81	2.36e-08	-0.936746	1.57631e-06	-0.950135	0.00020383	-1.19803	2.84774e-05	18	-0.8752	0	0.0372	0.0403		-3.95954	-3.86363	-4.94132	-3.91885
220	Dei	Neckar	3.2528e+07	5.39611e+06	1989-11-01	2003-07-12																10	-0.9021	0.0079	0.0267	0.4264
221	Pop	Neckar	3.2518e+07	5.41772e+06	1989-11-01	2010-10-30	21.0082	0	7497	61.0919	24.0865	2.87117	-0.75	0.27	0.0147	-0.650688	0.00279439	-0.47713	0.0121987	-0.931386	0.0212482	18	-0.6295	0.0002	0.0131	0.1669		-3.11378	-2.70146	-3.86684	-1.9809
222	Roc	Neckar	3.25004e+07	5.47552e+06	1989-11-01	2010-10-30	21.0082	0	7515	139.372	28.732	8.35374	-1.27	0.63	1.94e-05	-1.28294	2.7003e-05	-1.37799	0.000644285	-1.18139	0.00164901	21	-0.9019	0	0.023	0.0179		-4.42016	-4.46522	-4.11177	-4.796
223	Lau	Neckar	3.25116e+07	5.43557e+06	1989-11-01	2010-10-30	21.0082	0	7545	85.2551	22.0747	3.99391	-1.16	0.51	0.000265	-0.973429	8.58724e-05	-1.15653	0.00152084	-1.03971	0.000517485	19	-0.7317	0	0.0042	0.7368		-5.25489	-4.40971	-4.70995	-5.23918
230	Has	Main	3.26078e+07	5.54301e+06	2005-12-01	2010-10-30
231	Vie	Main	3.26283e+07	5.53169e+06	1989-11-01	2005-12-28	16.1671	1	5692	107.719	16.9291	2.2882	-0.42	0.3	0.0225	-0.392488	0.0765137	-0.0879734	0.83682	-0.615358	0.0427634	14	-0.1899	0.2759	-0.0059	0.7062		-2.48093	-2.31842	-3.63491
232	Mar	Main	3.25811e+07	5.50815e+06	1989-11-01	2010-10-30	21.0082	0	7362	115.344	20.6953	2.88032	-0.93	0.61	2.77e-05	-1.01134	1.1947e-05	-0.844645	0.000644285	-1.33998	2.7003e-05	17	-0.894	0	-0.0129	0.226		-4.49377	-4.88679	-6.47479	-4.08133
233	Kle	Main	3.25163e+07	5.50719e+06	1989-11-01	2010-10-30	21.0082	0	7480	172.343	25.2631	6.34588	-0.96	0.64	1.38e-05	-0.94122	5.91464e-05	-1.05727	0.00861079	-1.10877	7.628e-05	18	-0.9137	0	0.0026	0.8703		-3.80001	-3.72567	-4.38888	-4.18502
235	Gar	Main	3.25843e+07	5.53687e+06	1989-11-01	2005-12-31	16.1753	1	5828	111.982	22.0096	3.36318	-0.99	0.53	0.000971	-1.01361	0.000628545	-0.859854	0.0765137	-1.10496	0.00602581	13	-0.8158	0.0263	-0.0326	0.2319		-4.49804	-4.6053	-5.02035	-3.90672
236	Erl	Main	3.25613e+07	5.52293e+06	1989-11-01	2005-12-30	16.1726	1	5819	120.994	23.7738	3.65288	-0.88	0.4	0.0065	-1.11051	0.0057818	-0.465794	0.303097	-1.82725	0.00037543	14	-0.3639	0.1563	-0.0174	0.3197		-3.70156	-4.67116	-7.68599
237	Ste	Main	3.25476e+07	5.54522e+06	1989-11-01	2010-10-30	21.0082	0	7397	137.227	21.353	3.42822	-0.6	0.48	0.00053	-0.588356	0.00412153	-0.117255	0.48735	-1.12862	2.7003e-05	15	-0.5373	0.0055	0.0178	0.0808		-2.80991	-2.75538	-5.28555
238	Eic	Main	3.25399e+07	5.51163e+06	1989-11-01	2010-10-30		14
239	Edd	Main	3.24625e+07	5.54312e+06	1989-11-01	2010-10-30	21.0082	0	7585	213.515	27.6444	8.04016	-0.99	0.46	0.000673	-0.951942	0.0121987	-0.849903	0.0571181	-1.00166	0.00025836	18	-0.9455	0.0003	-0.0022	0.8171		-3.58119	-3.44352	-3.62337	-3.07441
241	Kal	Lahn	3.24214e+07	5.57394e+06	1989-11-01	2010-10-30	21.0082	0	6625	44.7045	20.9178	1.83788	-0.5	0.27	0.0155	-0.505154	0.0170533	-0.0343177	0.871131	-0.939253	0.00186908	19	-0.2686	0.0523	0.0205	0.1438		-2.39031	-2.41495	-4.49021
242	Wet	Lahn	3.24645e+07	5.6005e+06	1989-11-01	2007-08-23	17.8192	0	6079	27.9709	20.3315	0.872275	-0.54	0.35	0.00913	-0.565488	0.0188534	-0.502519	0.0488796	-0.610054	0.303097	13	-0.3564	0.1222	-0.0042	0.7898		-2.65598	-2.78134		-2.47163
251	Win	Mosel	3.23126e+07	5.49836e+06	1989-11-01	2010-10-30	21.0082	0	7534	142.575	31.3288	8.46381	-0.8	0.51	0.000295	-0.862887	0.000326349	-0.796899	0.0371977	-0.850115	0.00020383	18	-0.3351	0.0267	0.0082	0.1997		-2.55356	-2.75429	-2.71353	-2.54366
256	Det	Mosel	3.23449e+07	5.51985e+06	1989-11-01	2002-03-27
257	Coc	Mosel	3.23693e+07	5.55759e+06	1989-11-01	2010-10-30	21.0082	0	7331	318.231	27.2007	16.9194	-0.61	0.35	0.00467	-0.612043	0.00228926	-0.528977	0.138967	-0.590662	0.000644285	18	-0.1789	0.1723	0.0006	0.9323		-2.24259	-2.2501	-2.1715
258	Bro	Mosel	3.23886e+07	5.56488e+06	1989-11-01	2009-09-25	19.9123	2	6314	324.704	28.9272	18.2172	-0.59	0.18	0.0594	-0.526853	0.0409545	-0.887204	0.0478046	-0.504947	0.0178636	13	-0.4066	0.1184	0.0022	0.8618		-2.0396	-1.8213	-1.74558	-3.06702
260	Güd	Saar	3.2356e+07	5.45138e+06	1989-11-01	2010-10-30	21.0082	0	7444	40.3006	12.988	1.0406	-1.13	0.65	1.12e-05	-0.966809	2.7003e-05	-1.01657	2.7003e-05	-0.841065	0.000316611	12	-0.5109	0.0134	-0.0167	0.094		-8.70031	-7.44384	-6.47569	-7.82697
263	Ser	Saar	3.23259e+07	5.49315e+06	1989-11-01	2001-04-26
266	Völ	Rossel	3.23548e+07	5.71443e+06	1989-11-01	1994-12-31
277	Ham	Lippe	3.24185e+07	5.72687e+06	1989-11-01	2010-10-30	21.0082	1	7174	24.7239	14.6864	0.489907	-0.49	0.45	0.00113	-0.474882	0.000316611	-0.391562	0.0743529	-0.561211	0.00581982	19	-0.5333	0.0001	0.0369	0.0214		-3.33643	-3.23349	-3.82131	-2.66616
281	Rec	Rhein	3.24502e+07	5.26884e+06	1989-11-01	2010-10-30	21.0082	0	7369	441.589	16.2603	8.60189	-0.45	0.33	0.00664	-0.411751	0.0144471	-0.3878	0.0121987	-0.364403	0.111887	16	-0.6902	0.003	0.0207	0.4282		-2.76748	-2.53225		-2.38495
282	Alb	Rhein	3.24378e+07	5.27197e+06	1989-11-01	2010-10-30	21.0082	0	7524	1034.26	21.0076	28.747	-0.94	0.68	4.84e-06	-0.866817	9.80356e-05	-0.943478	0.00123327	-0.747222	0.0371977	20	-0.2758	0	0.0194	0.237		-4.47456	-4.1262	-3.55691	-4.49112
301	Rhe	Ems	3.23935e+07	5.79347e+06	1989-11-01	2010-10-30	21.0082	0	7407	37.9247	20.958	0.851034	-0.24	0.12	0.126	-0.313144	0.138967	-0.045713	0.927818	-0.667722	0.00339943	20	-0.7859	0.0853	0.0226	0.0301		-1.14515	-1.49415	-3.18599	-0.218117
303	Lat	Ems	3.23863e+07	5.85875e+06	1989-11-01	2010-10-30	21.0082	0	7523	83.0946	13.7133	1.24092	-0.84	0.73	9.83e-07	-0.869274	6.81643e-06	-0.841272	0.00228926	-0.731922	0.000160255	14	1.6804	0.0225	-0.0133	0.4939		-6.12545	-6.33892	-5.33732	-6.13472
321	Mep	Hase	3.23856e+07	5.83883e+06	1989-11-01	1996-10-31
401	Han	Werra	3.25453e+07	5.6966e+06	1989-11-01	2010-10-30	21.0082	0	7581	48.13	44.6611	2.72104	-1.16	0.5	0.000313	-1.21428	0.000326349	-0.985856	0.00861079	-1.7653	7.628e-05	19	-0.2219	0.1903	-0.0198	0.1732		-2.59734	-2.71889	-3.95266	-2.20742
402	Han	Fulda	3.25451e+07	5.69615e+06	1989-11-01	2010-10-30	21.0082	0	7581	62.2148	25.4295	2.20243	-0.65	0.39	0.00239	-0.668343	0.0121987	-0.773739	0.00412153	-0.768539	0.010266	13	-0.624	0.3176	0.0003	0.9851		-2.55609	-2.62822	-3.02224	-3.04269
403	Bod	Weser	3.25354e+07	5.75829e+06	1989-11-01	2010-10-30	21.0082	0	7455	147.327	23.1946	4.02256	-1.07	0.76	2.95e-07	-1.08044	5.91464e-05	-0.958431	0.000160255	-1.34958	0.000802711	17	-0.8294	0	-0.0057	0.4897		-4.61314	-4.65814	-5.81851	-4.13212
405	Int	Weser	3.25102e+07	5.8682e+06	1989-11-01	2010-10-30	21.0082	0	7543	324.473	35.7662	14.8521	-0.87	0.5	0.000366	-0.815301	0.00123327	-0.888175	0.00599747	-0.867263	0.027498	18	-0.8077	0.0032	0.0123	0.328		-2.43247	-2.27953	-2.42482	-2.48328
406	Ham	Weser	3.2524e+07	5.77267e+06	1989-11-01	2010-10-30	21.0082	0	7529	162.45	29.9969	6.21636	-1.36	0.88	3.64e-10	-1.27851	1.57631e-06	-1.20808	0.00020383	-1.49668	1.57631e-06	17	-0.4119	0	0.0134	0.2389		-4.5338	-4.26213	-4.98945	-4.02735
407	Höx	Weser	3.25275e+07	5.73624e+06	1989-11-01	2010-10-30	21.0082	0	7588	142.558	30.2015	5.74251	-0.87	0.69	3.24e-06	-0.899682	4.57021e-05	-0.685349	0.0235268	-1.25816	5.91464e-05	17	-1.0139	0.0298	0.011	0.299		-2.88065	-2.97893	-4.16589	-2.26925
408	Nie	Weser	3.25138e+07	5.83264e+06	1989-11-01	2010-10-30	21.0082	0	7316	201.421	29.1089	7.44749	-1.04	0.7	2.58e-06	-0.99167	3.51909e-05	-0.995726	0.00861079	-1.00017	0.000715426	18	-0.1962	0.0004	0.0175	0.1657		-3.57279	-3.40676	-3.43596	-3.42069
411	Mar	Aller	3.25477e+07	5.83703e+06	1989-11-01	2010-10-30	21.0082	0	7395	37.75	14.1029	0.57001	-0.38	0.63	1.82e-05	-0.374891	0.000802711	-0.123102	0.349219	-0.745127	5.91464e-05	16	-0.7981	0.1482	0.0017	0.9056		-2.69447	-2.65825	-5.28349	-0.872885
412	Ret	Aller	3.25261e+07	5.84853e+06	1989-11-01	2010-10-30	21.0082	0	7437	111.836	20.4563	2.33819	-0.74	0.69	2.78e-06	-0.739876	1.57335e-05	-0.527264	0.00339943	-0.969958	6.58933e-05	15	-0.9899	0.0045	0.0032	0.8609		-3.61747	-3.61687	-4.74162	-2.57752
421	Her	Leine	3.25471e+07	5.80368e+06	1989-11-01	2006-04-13	16.4575	1	5852	51.2522	30.5373	2.23386	-1.75	0.4	0.00617	-1.65244	0.0150836	-3.54825	0.000246235	-1.02913	0.165857	12	-0.1519	0.1711	-0.0717	0.0063		-5.73069	-5.41121		-11.6194
502	Hit	Elbe	3.26371e+07	5.89159e+06	1989-11-01	2010-10-30	21.0082	0	7351	671.448	33.299	19.3166	-0.06	0	0.806	-0.0855401	0.739764	-0.612416	0.00599747	0.760477	0.0371977	11	-0.5119	0.6029	-0.056	0.0243		-0.180185	-0.256885	2.28378	-1.83914
511	Pir	Elbe	3.28467e+07	5.65752e+06	1991-11-01	2010-10-30	19.0082	0	6519	322.687	25.0252	11.0459	-0.96	0.59	0.000124	-1.18696	0.000157813	-1.00133	0.00399311	-1.37267	0.0041201	17	-0.7228	0.001	-0.006	0.6186		-3.83614	-4.74305	-5.48516	-4.00128
512	Tor	Elbe	3.27781e+07	5.71927e+06	1993-11-01	2010-10-30	17.0055	0	5958	361.889	34.6593	16.3879	-1.39	0.73	1.23e-05	-1.36807	0.000177875	-1.10535	0.0119794	-2.04683	0.00113705	16	-0.9033	0.0023	0.0061	0.5548		-4.01046	-3.9472	-5.90557	-3.18917
513	Wit	Elbe	3.27492e+07	5.75184e+06	1991-11-01	2010-10-30	19.0082	0	6726	367.694	30.3579	11.9569	-1.25	0.66	2.34e-05	-1.15175	0.000467783	-0.93642	3.65459e-05	-1.44163	0.0117702	14	0.1045	0.001	-0.0153	0.1972		-4.11754	-3.79391	-4.74878	-3.0846
514	Ake	Elbe	3.27105e+07	5.74978e+06	1991-11-01	2010-10-30	19.0082	0	6614	429.307	26.6302	10.7869	-0.47	0.22	0.0433	-0.371372	0.0358051	-0.343328	0.123715	-0.52587	0.0588622	10	-1.1132	0.7555	-0.0383	0.1163		-1.76491	-1.39455		-1.28924
515	Bar	Elbe	3.26987e+07	5.76185e+06	1989-11-01	2010-10-30	21.0082	2	6757	550.006	35.6982	20.1803	-1.03	0.72	4.03e-06	-1.04201	4.94257e-05	-1.47342	0.00163998	-1.26694	0.00635509	12	-0.991	0.091	-0.0042	0.8817		-2.8853	-2.91893	-3.54904	-4.12743
516	Mag	Elbe	3.2681e+07	5.77862e+06	1992-11-01	2010-10-30	18.0055	0	6407	554.767	28.0644	16.0094	-1.91	0.76	2.06e-06	-1.95344	2.21238e-05	-1.37578	0.0004926	-2.87138	0.000652031	12	-0.395	0.0364	-0.034	0.2135		-6.80577	-6.96055	-10.2314	-4.90221
518	Tan	Elbe	3.27024e+07	5.82634e+06	1991-11-01	2010-10-30	19.0082	0	6814	560.8	33.8497	17.908	-1.26	0.69	1.09e-05	-1.17242	3.65459e-05	-1.06202	0.00128785	-1.63758	0.00128785	13	-0.6422	0.3357	-0.0593	0.0137		-3.72234	-3.46362	-4.83779	-3.13746
519	Wit	Elbe	3.26845e+07	5.87445e+06	1993-11-01	2010-10-30	17.0055	0	6052	696.605	34.4449	21.3281	-0.96	0.38	0.00825	-1.01204	0.00945536	-0.742516	0.000628545	-1.43365	0.0637866	12	-1.0493	0.094	-0.0483	0.0692		-2.78706	-2.93816	-4.16216	-2.15567
520	Mei	Elbe	3.28123e+07	5.67862e+06	1994-11-01	2010-10-30	16.0055	0	5308	341.922	26.9755	10.3353	-1.72	0.68	9.22e-05	-1.68818	0.00255704	-1.26935	0.0170238	-2.14991	0.00189282	12	-1.3289	0.0064	-0.0069	0.7471		-6.37615	-6.25821	-7.96987	-4.70557
531	Cal	Saale	3.26915e+07	5.75407e+06	1991-11-01	2010-10-30	19.0082	0	6781	112.964	29.3992	3.73311	-2.02	0.6	0.000103	-1.9889	0.000606734	-1.75442	0.0096274	-1.94649	0.00100671	6	-0.5139	0.0395	-0.0266	0.5157		-6.87094	-6.76516	-6.62089	-5.96759
541	Rat	Havel	3.27249e+07	5.83372e+06	1991-11-01	2010-10-30	19.0082	0	6845	73.2267	17.2038	1.21603	-0.82	0.85	2.26e-08	-0.827763	1.43647e-05	-0.491799	0.00635509	-1.03998	0.000358992	16	-0.5917	0.0133	-0.0331	0.3456		-4.7664	-4.81152	-6.0451	-2.85867
542	Ket	Havel	3.27618e+07	5.8195e+06	1991-11-01	2010-10-30	19.0082	0	6759	55.7093	14.9629	0.776265	-0.72	0.84	2.7e-08	-0.7247	1.43647e-05	-0.618298	0.000358992	-0.910643	8.91446e-05	12	-0.7138	0.0316	-0.062	0.1363		-4.8119	-4.84332	-6.08601	-4.13221
543	Zeh	Havel	3.27908e+07	5.87918e+06	1991-11-01	2010-10-30	19.0082	0	6731	10.0234	12.0928	0.11668	-0.75	0.83	6.23e-08	-0.740753	1.43647e-05	-0.64246	0.000179856	-0.863696	0.000783342	8	-0.6135	0.0002	0.0086	0.5314		-6.20205	-6.12558	-7.14224	-5.31276
551	Ber	Spree	3.2799e+07	5.82745e+06	1991-11-01	2004-10-19
552	Für	Spree	3.28447e+07	5.81258e+06	1991-11-01	2010-10-30	19.0082	0	6761	18.6176	11.8885	0.22215	-1.04	0.92	1.43e-10	-1.05695	2.2444e-07	-0.742848	2.68964e-05	-1.25543	1.95484e-06	10	-0.5614	0.0105	-0.0685	0.0255		-8.74797	-8.8905	-10.5601	-6.24847
590	Wus	Elbe-Havel-Kanal	3.27285e+07	5.81002e+06	1994-11-01	2010-10-30	16.0055	0	5751	7.47579	14.2782	0.106984	-0.47	0.42	0.00636	-0.562685	0.00456226											-3.29173	-3.94086
601	Fra	Oder	3.2878e+07	5.81576e+06	1991-11-01	2010-10-30	19.0082	0	6462	295.376	25.7814	7.07735	-0.79	0.56	0.000229	-0.848648	0.00128785	-0.521405	0.00512856	-1.43318	0.0041201	14	-1.0795	0.3626	-0.0262	0.3892		-3.06423	-3.29171	-5.55899	-2.02241
602	Hoh	Oder	3.2845e+07	5.86716e+06	1991-11-01	2010-10-30	19.0082	0	6502	502	23.4412	10.591	-0.96	0.66	2.38e-05	-0.954662	0.000208515	-0.589635	0.00207885	-1.30042	0.0100042	15	-0.7584	0.021	-0.0165	0.6031		-4.09534	-4.07257	-5.54756	-2.51537
603	Sch	Oder	3.28561e+07	5.88932e+06	1991-11-01	2010-10-30	19.0082	0	6618	502.893	25.4476	11.3257	-1.02	0.66	2.33e-05	-1.01727	0.000208515	-0.552505	0.0041201	-1.49921	0.00313216	13	-16.957	0.0107	-0.0253	0.4185		-4.00823	-3.99752	-5.89136	-2.17115
									439292
																				1.26816						Max		-0.180185	-0.256885	2.28378	-0.218117
																				-1.01691						Mean		-3.68673	-3.68305	-4.70563	-3.66122
																				-2.87138						Min		-8.74797	-8.8905	-10.5601	-11.6194
																													-3.46362

## Sheet: Tab. S3 land use
	Arable land (ha)			permanent Grassland (ha)			Grain maize (Körnermais) (ha)			Potatos (ha)			Sugar beet (ha)			Silage (fodder) maize (ha)				C factor agriculture			C factor agriculture (% of 1990)			R-factor (% of 1990)	RxC (% of 1990)
Year	DE	new federal states	old federal states	DE	new federal states	old federal states	DE	new federal states	old federal states	DE	new federal states	old federal states	DE	new federal states	old federal states	DE	new federal states	old federal states	old federal states	DE	new federal states	old federal states	DE	new federal states	old federal states
1990	11971300	4683200	7288200	5617900	1243200	4374700	228400	1000	227500	548400	337200	211300	608100	202200	405900	1365400	471400	893800	0.105	0.087	0.088	0.067	1	1	1	1	1
1991	11545955	4244459	7301497	5265015	997798	4267217	282748	19326	263421	340515	117193	223322	553740	167097	386644	1308207	422260	885947	0.106	0.078	0.079	0.069	0.9	0.91	1.02	1.22	1.1
1992	11467500	4141100	7326400	5242700	948600	4294000	295700	20300	275300	360900	109200	251700	533600	152800	380900	1242800	369900	872900	0.108	0.08	0.078	0.069	0.92	0.89	1.03	1.33	1.22
1993	11644500	4265800	7378700	5251400	997100	4254300	331100	33000	298100	312300	74300	238000	521700	148500	373200	1264400	390500	873900	0.107	0.074	0.077	0.07	0.85	0.87	1.03	1.46	1.24
1994	11805300	4388300	7417000	5270700	1040200	4239500	345400	38000	307400	293400	60200	233100	500000	133400	366500	1205000	334200	950100	0.109	0.071	0.074	0.071	0.81	0.84	1.05	1.25	1.02
1995	11834500	4437800	7396700	5282000	1078400	4203600	325100	35700	289300	315200	68100	247100	512900	143500	369300	1251800	372300	879500	0.108	0.072	0.075	0.07	0.82	0.85	1.04	1.51	1.24
1996	11832300	4456200	7376000	5273400	1096000	4177500	372100			335800	70900	264900	515500	143200	372300	1326500	424100	902400	0.102	0.073	0.075	0.067	0.84	0.86	0.99	1.33	1.12
1997	11831600	4459900	7371700	5268400	1110200	4158200	388300	38500	349800	303600	60200	243400	503700	138200	365500	1294500	398700	895800	0.109	0.073	0.078	0.071	0.83	0.89	1.06	1.51	1.26
1998	11879500	4485200	7394200	5265400	1118300	4147100	341000	33800	307200	297300	57500	239800	503400	135700	367700	1235100	373400	861700	0.107	0.071	0.074	0.07	0.82	0.84	1.04	1.79	1.47
1999	11821500	4474800	7346600	5113800	1107900	4005900	370700	38300	332400	309500	58900	250600	489200	130500	358700	1202800	327400	875400	0.109	0.072	0.073	0.072	0.83	0.83	1.07	1.47	1.22
2000	11803500	4478200	7325300	5047600	1103700	3943900	360800	37900	322900	304300	58600	245700	452000	120200	331800	1154500	311900	842600	0.108	0.072	0.072	0.072	0.83	0.82	1.07	1.66	1.37
2001	11813200	4472000	7341200	5012600	1104100	3908500	396500	42500	354000	282100	52800	229300	447700	117000	330700	1132500	308300	824200	0.108	0.072	0.072	0.072	0.82	0.82	1.07	1.41	1.16
2002	11790900	4456400	7334500	4969600	1101700	3867900	398700	46600	352100	284100	51700	232400	459400	119900	339500	1119200	297400	821800	0.108	0.072	0.072	0.072	0.82	0.82	1.07	2.86	2.36
2003	11826900	4443500	7383400	4968300	1087200	3881100	468900	66300	402600	284400	51900	232500	445500	115700	329800	1171100	323200	847900	0.109	0.073	0.073	0.073	0.84	0.84	1.09	1.17	0.98
2004	11898700	4461900	7436800	4913400	1078200	3835200	461700	69200	392500	295300	55300	240000	440500	115900	324600	1248500	337500	911000	0.111	0.074	0.074	0.074	0.85	0.85	1.11	1.47	1.25
2005	11903300	4468600	7434700	4929000	1091300	3837700	443100	70300	372800	276900	50600	226300	420100	107500	312600	1262500	329900	932600	0.11	0.074	0.074	0.074	0.85	0.84	1.1	1.49	1.26
2006	11866100	4474100	7392000	4881700	1090700	3791000	401000	50600	350400	260800	50700	210100	357600	91500	266100	1345900	357100	988800	0.111	0.075	0.074	0.075	0.86	0.85	1.11	1.84	1.58
2007	11877000	4452800	7424200	4874700	1091900	3782800	403200	62200	341000	275000	49300	225700	402700	107900	294800	1470900	391700	1079200	0.113	0.076	0.075	0.076	0.87	0.86	1.14	2.39	2.09
2008	11932500	4450300	7482200	4788700	1083100	3705600	520500	75900	444600	259800	39000	220800	369300	97000	272300	1566600	431400	1135200	0.117	0.079	0.077	0.079	0.9	0.88	1.18	1.7	1.53
2009	11945100	4462000	7483100	4741400	1081500	3659900	464300	60300	404000	263700	38600	225100	383600	99200	284400	1646700	458400	1188300	0.117	0.079	0.077	0.08	0.91	0.88	1.19	1.52	1.38
2010	11846700	4450300	7396400	4654700	1077400	3563200	466600	63800	402800	254400	44400	210000	364100	97100	267000	1828900	504700	1324200	0.121	0.081	0.079	0.083	0.93	0.9	1.23	1.96	1.84
